# Supplementary material for: 3D-QSAR and Molecular Docking Studies on the TcPMCA1-Mediated Detoxification of Scopoletin and Coumarin Derivatives
Source: PubMed Central journal article supplement (PMC5535873; doi:10.3390/ijms18071380), 2017-06-27
Supplement: ijms-18-01380-s001.pdf [file ijms-18-01380-s001.pdf]

1 **Supplementary Materials:**2 **3D-QSAR and molecular docking studies on the *TcPMCA1*-mediated**  
3 **detoxification of scopoletin and coumarin derivatives**4 **Qiu-li Hou#, Jin-xiang Luo#, Bing-chuan Zhang, Gao-fei Jiang, Wei Ding, and Yong-qiang**  
5 **Zhang\***6 Laboratory of Natural Products Pesticides, College of Plant Protection, Southwest University, Chongqing,  
7 400715, P. R. China; houqiuli2000@126.com (Q.H.); xiangxiangnx@sohu.com (J.L.); zhbichting@163.com  
8 (B.Z.); Gaofei.Jiang@toulouse.inra.fr (G.J.); dwing818@163.com (W.D.); zyqiang@swu.edu.cn (Y.Z.)

9 #These two authors contributed equally to this work.

10 \* Correspondence: zyqiang@swu.edu.cn; Tel./Fax: +86-23-6825-0218

11

12 **Table S1. Primer sequences used in cloning and quantitative real-time PCR**

| Experiments              | Primer names and sequences (5' to 3')  | Product length (bp) |
|--------------------------|----------------------------------------|---------------------|
| Specific PCR             | TcPMCA1-F: CGGGATCCCCTGCCCTTTGACATTTA  | 2000                |
|                          | TcPMCA1-R: CCGCTCGAGCACGGACTTCATACCTCG |                     |
| 5' RACE                  | TcPMCA1-F1: GTTTTAGGTGGTTTAGGAGGA      | 667                 |
|                          | TcPMCA1-F2: TCCTCTAAATCTTTGGGTGA       |                     |
| 3' RACE                  | TcPMCA1-R1: TCGAAACAGAGCCAAATTGGGAAGA  | 1355                |
|                          | TcPMCA1-R2: AACTTGGCATCGAAGATCCCGTCC   |                     |
| Full-length confirmation | TcPMCA1-1: CGGGATCCCCTGCCCTTTGACATTTA  | 2027                |
|                          | TcPMCA1-2: CGCTCGAGCACGGACTTCATACCTCG  |                     |
|                          | TcPMCA1-3: CGGGATCCCACGGACTTCATACCTCG  | 3056                |
|                          | TcPMCA1-4: CCGCTCGAGCACCAAAGCCATTGTTCT |                     |
|                          | TcPMCA1-5: CGGGATCCCACGGACTTCATACCTCG  | 683                 |
|                          | TcPMCA1-6: CCGCTCGAGGCACCCAATAAAGCAAAT |                     |
| RT-qPCR                  | TcPMCA1-Q-F: GTTTGGCCTCGTTTACGTGT      | 201                 |
|                          | TcPMCA1-Q-R: TTCCTTGGCTACATCGGTTC      |                     |
| <i>RPS18</i>             | RPS18-F: ACGTGCTGGTGAACCTTACCGAAGA     | 99                  |
|                          | RPS18-R: TGCCTATTCAAGAACCAAAGTGGG      |                     |

13

**Table S2.** Sequences and relevant information used in the phylogenetic analysis of plasma membrane Ca<sup>2+</sup>-ATPase (PMCA).

| Organism                                   | Accession number |
|--------------------------------------------|------------------|
| <b>Ixodes</b>                              |                  |
| <i>Tetranychus urticae</i> PMCA1           | tetur02g05600    |
| <i>Tetranychus urticae</i> PMCA2           | tetur09g02350    |
| <i>Tetranychus urticae</i> SERCA1          | tetur18g02100    |
| <i>Ixodes scapularis</i> PMCA2             | EEC15444.1       |
| <i>Ixodes scapularis</i> E1-E2 ATPase      | EEC11414.1       |
| <b>Cnidaria (Outgroup)</b>                 |                  |
| <i>Stylophora pistillata</i>               | AY360080         |
| <b>Insect</b>                              |                  |
| <i>Aedes aegypti</i>                       | XP_001651107.1   |
| <i>Anopheles gambiae</i>                   | XP_311357.4      |
| <i>Apis mellifera</i> PMCA3                | XP_003250350.1   |
| <i>Acythosiphon pisum</i> PMCA1            | XP_001945158.1   |
| <i>Acythosiphon pisum</i> PMCA2            | XP_001950494.1   |
| <i>Camponotus floridanus</i>               | EFN65040.1       |
| <i>Culex quinquefasciatus</i>              | XP_001847165.1   |
| <i>Drosophila melanogaster</i>             | NP_001033803.3   |
| <i>Drosophila mojavensis</i>               | XP_002011413.1   |
| <i>Danaus plexippus</i>                    | EHJ74187.1       |
| <i>Pediculus humanus corporis</i>          | XP_002427234.1   |
| <i>Tribolium castaneum</i>                 | XP_966434.1      |
| <b>Chordate</b>                            |                  |
| <i>Branchiostoma floridae</i>              | XP_002586028.1   |
| <i>Ciona intestinalis</i>                  | XP_002126083.2   |
| <i>Danio rerio</i> PMCA1                   | NP_001038222.1   |
| <i>Danio rerio</i> PMCA2                   | NP_001116710.1   |
| <i>Danio rerio</i> PMCA3                   | NP_001002472.1   |
| <i>Danio rerio</i> PMCA4                   | EU559285.1       |
| <i>Gallus gallus</i> PMCA1                 | NP_001161474.1   |
| <i>Gallus gallus</i> PMCA2                 | XP_001231642.1   |
| <i>Gallus gallus</i> PMCA4                 | XP_418055.2      |
| <i>Homo sapiens</i> PMCA1                  | NP_001001323.1   |
| <i>Homo sapiens</i> PMCA2                  | NP_001001331.1   |
| <i>Homo sapiens</i> PMCA3                  | NP_068768.2      |
| <i>Homo sapiens</i> PMCA4                  | NP_001001396.1   |
| <i>Mus musculus</i> PMCA1                  | NP_080758.1      |
| <i>Mus musculus</i> PMCA2                  | NP_033853.1      |
| <i>Mus musculus</i> PMCA3                  | NP_796210.2      |
| <i>Mus musculus</i> PMCA4                  | NP_998781.1      |
| <i>Ornithorhynchus anatinus</i> PMCA1      | XP_001512183.1   |
| <i>Ornithorhynchus anatinus</i> PMCA3      | XP_001510240.1   |
| <i>Ornithorhynchus anatinus</i> PMCA4      | XP_001518636.1   |
| <i>Xenopus laevis</i> PMCA1                | EU752492.1       |
| <i>Xenopus laevis</i> PMCA2                | NP_001087020.1   |
| <i>Xenopus (Silurana) tropicalis</i> PMCA3 | NP_001124515.1   |
| <b>Nematoda</b>                            |                  |
| <i>Caenorhabditis briggsae</i> PMCA1       | XP_002633689.1   |
| <i>Caenorhabditis briggsae</i> PMCA2       | XP_002634908.1   |
| <i>Caenorhabditis briggsae</i> PMCA3       | XP_002633968.1   |
| <i>Caenorhabditis elegans</i> PMCA1        | NP_741352.1      |
| <i>Caenorhabditis elegans</i> PMCA2        | NP_500161.1      |
| <i>Caenorhabditis elegans</i> PMCA3        | NP_501709.2      |

**Table S3.** Acaricidal activities of test compounds

| Compo<br>und | LC <sub>50</sub> |               |                  |               | R      | Compo<br>und. | LC <sub>50</sub> |               |                  |               | R      |
|--------------|------------------|---------------|------------------|---------------|--------|---------------|------------------|---------------|------------------|---------------|--------|
|              | (mg/L)           |               | (mmol/L)         |               |        |               | (mg/L)           |               | (mmol/L)         |               |        |
|              | LC <sub>50</sub> | SE(95%<br>CL) | LC <sub>50</sub> | SE(95%<br>CL) |        |               | LC <sub>50</sub> | SE(95%<br>CL) | LC <sub>50</sub> | SE(95%<br>CL) |        |
| <b>1a</b>    | 0.4059           | 0.0493        | 1.2175           | 0.1479        | 0.9929 | <b>16a</b>    | 1.3039           | 0.2671        | 6.0313           | 1.2355        | 0.9947 |
| <b>2a</b>    | 0.3027           | 0.0234        | 0.8638           | 0.0668        | 0.9933 | <b>17a</b>    | 1.2774           | 0.2075        | 5.188            | 0.8427        | 0.9612 |
| <b>3a</b>    | 0.4788           | 0.0338        | 2.971            | 0.2097        | 0.9979 | <b>18a</b>    | 1.4538           | 0.2574        | 5.3789           | 0.9523        | 0.9857 |
| <b>4a</b>    | 0.6624           | 0.0696        | 3.52             | 0.3699        | 0.967  | <b>19a</b>    | 1.2914           | 0.2317        | 6.2036           | 1.113         | 0.9958 |
| <b>5b</b>    | 0.3975           | 0.0524        | 2.2563           | 0.2974        | 0.976  | <b>20a</b>    | 2.2619           | 0.7932        | 12.6973          | 4.4527        | 0.8523 |
| <b>6b</b>    | 9.9386           | 1.0688        | 61.2926          | 6.5914        | 0.9283 | <b>21b</b>    | 0.6818           | 0.0878        | 3.8273           | 0.4929        | 0.9838 |
| <b>7a</b>    | 5.7926           | 2.5973        | 22.784           | 10.2159       | 0.993  | <b>22a</b>    | 3.2451           | 1.1658        | 20.0142          | 7.1901        | 0.955  |
| <b>8a</b>    | 0.6344           | 0.1312        | 3.319            | 0.6864        | 0.8435 | <b>23a</b>    | 2.0671           | 0.3547        | 14.1447          | 2.4271        | 0.9243 |
| <b>9b</b>    | 1.398            | 0.3235        | 5.4987           | 1.2724        | 0.9775 | <b>24a</b>    | 1.3959           | 0.313         | 4.876            | 1.0933        | 0.9932 |
| <b>10b</b>   | 2.4756           | 0.5829        | 14.1318          | 3.3274        | 0.9903 | <b>25a</b>    | 1.2512           | 0.155         | 5.0816           | 0.6295        | 0.9972 |
| <b>11a</b>   | 5.9646           | 0.9378        | 33.8571          | 5.3233        | 0.9206 | <b>26a</b>    | 2.473            | 0.7258        | 15.4398          | 4.5314        | 0.9922 |
| <b>12b</b>   | 4.281            | 0.905         | 22.269           | 4.7077        | 0.9906 | <b>27a</b>    | 0.4687           | 0.0504        | 1.9186           | 0.2063        | 0.9697 |
| <b>13a</b>   | 0.2848           | 0.0302        | 1.3813           | 0.1465        | 0.9824 | <b>28a</b>    | 3.2722           | 1.4539        | 15.1358          | 6.7251        | 0.9782 |
| <b>14a</b>   | 4.7762           | 0.6985        | 25.6564          | 3.7521        | 0.9951 | <b>29a</b>    | 0.7682           | 0.1033        | 3.8              | 0.511         | 0.9532 |
| <b>15a</b>   | 1.2433           | 0.1278        | 6.4698           | 0.665         | 0.9618 | <b>30a</b>    | 0.5732           | 0.0526        | 2.5798           | 0.2367        | 0.9139 |

**R:** Relative coefficient.

**a:** training compounds; **b:** test set compounds; the others same to **Table 2**.

1 ATGGAGGCCGCGCACTCCAAGAGCACAGGAATGTCTGGCCTATTTGGGGTGAGCGAGACCACAGGCCTACCCCGGACCAAGTGAAG  
1 M E A A H S K S T E E C L A Y F G V S E T T G L T P D Q V K

91 CGACATCTAGAGAAATACGGCCACAATGAGCTTCTGCTGAGGAAGGAAATCCCTGTGGGAGCTGGTGATAGAGCAGTTTGAAGACCTC  
31 R H L E K Y G H N E L P A E E G K S L W E L V I E Q F E D L

181 CTGGTGGGATTCTTCTGCTGGCCGCTGCATCTCCTTGTGCTGGCCTGGTTGAAGAAGGGGAAGAGACCATCACTGCCTTCGTTGAG  
61 L V R I L L L A A C I S F V L A W F E E G E E T I T A F V E

271 CCCTTTGTCATCCTCCTGATCCTCATTGCCAATGCCATCGTGGGAGTTTGGCAGGAGCGAACGCTGAGAACCCTATAGAGGCGCTGAAG  
91 P F V I L L I L I A N A I V G V W Q E R N A E N A I E A L K

361 GAATATGAGCCCGAGATGGGGAAGGTGTACCGGGCTGACCGCAAGTCAGTGCAAAGGATCAAGGCTCGGGACATCGTCCCGGGGACATC  
121 E Y E P E M G K V Y R A D R K S V Q R I K A R D I V P G D I

451 GTGGAGGTGGCGTTGGGGACAAAGTCCCTGCAGACATCCGCATCCTGTCTATCAAGTCCACCACCCTCCGCGTGGACCAGTCCATCCTG  
151 V E V A V G D K V P A D I R I L S I K S T T L R V D Q S I L

541 ACAGGCGAGTCTGTGCCGTCATCAAGCACACGGAGCCAGTCCCTGACCCGCGGGCTGTCAACCAGGACAAGAAGCATGCTTTTCTCG  
181 T G E S V S V I K H T E P V P D P R A V N Q D K K N M L F S

631 GGTACCAACATCGCGGCCGCAAGGCCCTGGGCATCGTGGCCACCACCGCGTGAGCACCGAGATCGGAAGATCCGTGACCAGATGGCC  
211 G T N I A A G K A L G I V A T T G V S T E I G K I R D Q M A

721 GCCACGGAGCAGGACAAGACGCGCTGCAGCAGAAGTGGATGAGTTCGGGGAGCAGCTGTCCAAGGTCATCCTCCTCATCGCGTGGCC  
241 A T E Q D K T P L Q Q K L D E F G E Q L S K V I S L I C V A

811 GTGTGGCTTATCAACATCGGCCACTTCAACGACCCCGTCCACGGGGCTCCTGGATCCGCGGTGCCATCTACTACTTCAAGATCGCCGTG  
271 V W L I N I G H F N D P V H G G S W I R G A I Y Y F K I A V

901 GCCTTGGCTGTGGCTGCGATCCAGAAGTCTTCCCGCTGTCATCACTACCTGCCTGGCCCTGGGACCCCGCGGATGGCAAGAAGAAC  
301 A L A V A A I P E G L P A V I T T C L A L G T R R M A K K N

991 GCCATCGTGAGGACCTGCCCTCTGTGGAGACCCTGGGCTGCACCTCTGTCATCTGCTCTGACAAGACTGGCACCCCTACCACCAACCAG  
331 A I V R S L P S V E T L G C T S V I C S D K T G T L T T N Q

1081 ATGTCTGTGTGCAAGATGTTTCATCATCGACAAGGTGGACGGAGACTTCTGTTGCTGAACGAGTTCTCCATACCGGCTCCACCTACGCT  
361 M S V C K M F I I D K V D G D F C S L N E F S I T G S T Y A

1171 CCAGAGGGGGAGTCTGAAGAATGATAAACCCATCCGGTCAGGGCAGTTTGATGGGCTGGTGGAGCTGGCCACCATTTGTGCCCTGTGC  
391 P E G E V L K N D K P I R S G Q F D G L V E L A T I C A L C

1261 AATGATTCTCCTTGGACTTCAATGAGACCAAAGCGTCTATGAGAAGGTGGGTGAGGCCACGGAGACGGCGCTCACCACCCTGGTGGAG  
421 N D S S L D F N E T K G V Y E K V G E A T E T A L T T L V E

1351 AAGATGAATGTGTTCAACACGGAAGTTCGGAACCTCTCGAAGGTGGAGAGACCAACGCCTGCAACTCGGTGATCCGCCAGCTCATGAAG  
451 K M N V F N T E V R N L S K V E R A N A C N S V I R Q L M K

1441 AAAGAGTTCACCCCTGGAGTCTCCCGAGACAGGAAGTCCATGTCTGTGTACTGTTCTCCAGCAAATCTCCCGCGCTGCTGTGGCAAC  
481 K E F T L E F S R D R K S M S V Y C S P A K S S R A A V G N

1531 AAGATGTTTGTCAAGGGCGCCCGAGGGGTTCATGACCCTGTAACACGTGCGAGTCGGCACCACCCGGTGCCCATGACTGGGCCG  
511 K M F V K G A P E G V I D R C N Y V R V G T T R V P M T G P

1621 GTGAAGGAGAAGATCCTCTCCGTGATCAAGGAGTGGGGACCCGGCCGGACACGCTGCGCTGCCTGGCCCTGGCCACCCGCGACACGCCG  
541 V K E K I L S V I K E W G T G R D T L R C L A L A T R D T P

1711 CCCAAGCGAGAGAAAATGGTGCTGGACGACTCCTCCCGTTCATGGAGTACGAGACGGACCTGACGTTTCGTGGGCGTCTGGGCATGCTG  
571 P K R E E M V L D D S S R F M E Y E T D L T F V G V V G M L

1801 GACCCGCCCCGCAAGGAGTTCATGGGCTCCATCCAGCTGTGCCGGGACCCGGGATCCGTGTCATCATGATCACCGGCACAACAAGGGC  
601 D P P R K E V M G S I Q L C R D A G I R V I M I T G D N K G

1891 ACGGCCATCGCCATCTGCCGCCATCGGCATCTTTGGGAGAACGAGGAGGTGGCAGACCCGCTACACCCGGCCGAGTTTGACGAC  
631 T A I A I C R R I G I F G E N E E V A D R A Y T G R E F D D

1981 CTGCCCTGGCCGAGCAGCGGGAAGCCTGCCGCCGCGCTGCTGCTCGCGCGGTGGAACCTCCACAAGTCCAAGATCGTGAATAC  
661 L P L A E Q R E A C R R A C C F A R V E P S H K S K I V E Y

2071 CTGCAGTCTACGATGAGATCAGGCCATGACAGGGGATGGCGTCAACGATGCCCTGCCCTGAAGAAGCCGAGATCGGCATAGCTATG  
691 L Q S Y D E I T A M T G D G V N D A P A L K K A E I G I A M

2161 GGATCTGGCACCCTGGCCAAGACAGCTGTGAGATGGTCTGGCGGACGACAACTTCTCCACCATCGTGCCCGCGTGGAGAGGGC  
721 G S G T A V A K T A S E M V L A D D N F S T I V A A V E E G

2251 CGGGCCATCTACAACAACATGAAGCAGTTCATCCGCTACCTCATCTCTCCAACGTGGCGAGGTGGTCTGCATCTTCTGACGGCCGCC  
751 R A I Y N N M K Q F I R Y L I S S N V G E V V C I F L T A A

2341 TTGGGGCTGCCCGAGGCCCTGATCCCCGTGACGTGCTGTGGGTGAACCTGGTGACGGACGGGCTCCCGGCCACAGCCCTGGGCTTCAAC  
781 L G L P E A L I P V Q L L W V N L V T D G L P A T A L G F N

2431 CCACCAGACCTGGACATCATGGACCGCCCCCGGAGTCCCAAGGAGCCCTGATCAGTGGTGGCTCTTCTCCGCTACATGGCCATC  
811 P P D L D I M D R P P R S P K E P L I S G W L F F R Y M A I

2521 GGGGGCTATGTTGGTGCAGCCACCGTGGGAGCCGCTGCCTGGTGGTTCATGTATGCGGAGGATGGGCCGGGTGTACCTACCACCAGCTG  
841 G G Y V G A A T V G A A A W W F M Y A E D G P G V T Y H Q L

2611 ACCCACTTCATGCAGTGCACCGAGGACCACCTCACTTTGAGGGTCTGGACTGTGAGATCTTTGAGGCCACAGCCCATGACCATGGCC

---

871 T H F M Q C T E D H P H F E G L D C E I F E A P E P M T M A

2701 TTGTCTGTGCTGGTGACCATCGAGATGTGCAATGCTCTCAACAGCCTGTCCGAGAACCAGTCCTTGATGCGGATGCCGCCCTGGGTGAAC

901 L S V L V T I E M C N A L N S L S E N Q S L M R M P P W V N

2791 ATCTGGCTGCTGGGCTCCATCTGCCTGTCCATGTCCCTCCACTTCCTCATCCTCTACGTCGACCCCTGCCGATGATCTTCAAGCTCAAG

931 I W L L G S I C L S M S L H F L I L Y V D P L P M I F K L K

2881 GCCCTAGACCTCACCCAGTGGCTCATGGTCCTCAAGATCTCACTTCCAGTCATCGGGCTGGATGAAATACTCAAGTTCATTGCTCGGAAC

961 A L D L T Q W L M V L K I S L P V I G L D E I L K F I A R N

2971 TACCTGGAGGATCCAGAAGATGAAAGGAGGAAGTAA

991 Y L E D P E D E R R K \*

**Figure S1.** Nucleotide and amino acid sequence of the crystallographic structure of SERCA Ca<sup>2+</sup>-ATPase used as template for homology modeling (PDB ID code: 3BA6).
